# Supplementary material for: Efficient three-component coupling catalysed by mesoporous copper–aluminum based nanocomposites
Source: Royal Society of Chemistry journal article supplement (doi:10.1039/c3gc36607c), 2013-01-01
Supplement: c3gc36607c.pdf [file c3gc36607c.pdf]

## Electronic Supplementary Information

# Efficient three-component coupling catalysed by mesoporous copper-aluminum based nanocomposites

Jana Dulle,<sup>a</sup> K. Thirunavukkarasu,<sup>b</sup> Marjo C. Mittelmeijer-Hazeleger,<sup>c</sup> Daria V. Andreeva,<sup>a\*</sup> N. Raveendran Shiju<sup>c\*</sup> and Gadi Rothenberg<sup>c\*</sup>

### <sup>1</sup>H-NMR spectra of selected examples

<sup>1</sup>H-NMR spectra were recorded in CDCl<sub>3</sub> with TMS as an internal standard at ambient temperature on a Bruker NMR instrument operating at 300 MHz.

i. entry 2 of Table 1:

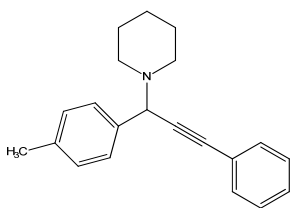

<sup>20</sup> N-[1-(4-Methylphenyl)-3-phenyl-2-propynyl]piperidine.  $\delta$ : 7.50-7.45 (m, 2H), 7.35-7.25(m, 3H), 7.15-7.05 (m, 4H), 4.70 (s, 1H), 2.60-2.50 (m, 4H), 2.45 (s, 3H), 1.70-1.50 (m, 4H), 1.45-1.30 (m, 2H).

ii. entry 3 of Table 1:

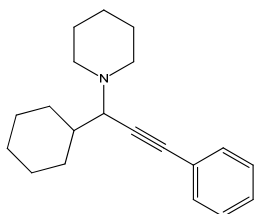

<sup>25</sup> N-(1-Cyclohexyl-3-phenyl-2-propynyl)-piperidine,  $\delta$  = 7.47-7.35 (m, 3H), 7.30-7.20 (m, 4H), 3.05 (d, 1H), 2.70-2.50 (m, 2H), 2.5-2.3 (m, 2H), 2.2-2.0 (m, 2H), 1.80-1.40 (m, 6H), 1.35-0.9 (m, 7H).

iii. entry 7 of Table 1:

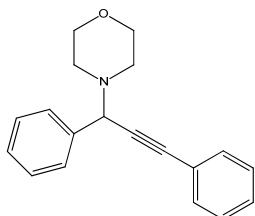

<sup>35</sup> 4-(1,3-Diphenyl-2-propynyl)-morpholine,  $\delta$  = 7.65-7.55 (m, 2H), 7.55-7.40 (m, 3H), 7.40-7.20 (m, 5H), 4.75 (s, 1H), 3.80-3.60 (m, 4H), 2.70-2.50 (m, 4H).

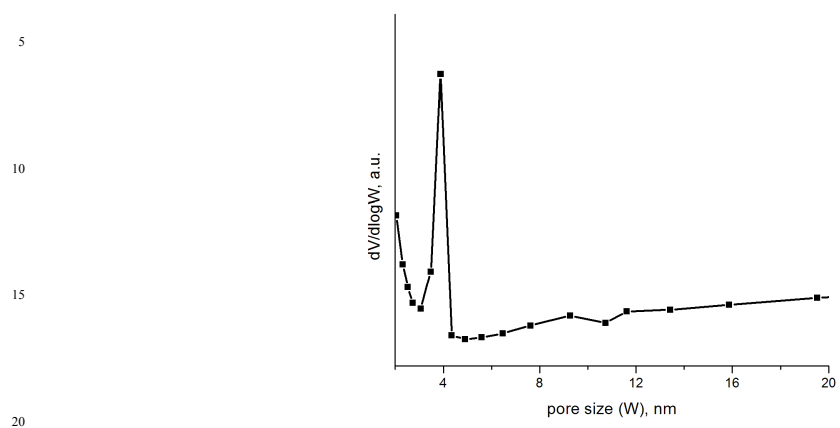

BJH pore-size distribution of Cu/Al catalyst.
